# Supplementary material for: Chronic fractalkine administration improves glucose tolerance and pancreatic endocrine function
Source: JCI journal article supplement (doi:10.1172/jci94330), 2018-03-04

**Supplementary Figure 1. 10 mg/kg FKN-Fc improves glucose tolerance for 2 days in**

**lean mice.** GTTs in NCD WT mice at day 2. A single injection of 10 mg/kg FKN-Fc or vehicle was given to NCD WT mice at day 0 and, at day 2, glucose tolerance was measured without any further FKN-Fc administration. Mean $\pm$ SEM. \*  $p < 0.05$ ;  $n = 8$  for both groups (result of 1 time experiment), two tailed unpaired t-test.

**Supplementary Figure 2. Chronic FKN-Fc administration increases insulin secretion**

**and decreases apoptosis in the islets of obese mice.** (A) Insulin secretion activity in Min6

cells incubated in low glucose (2 mM) conditions with or without FKN-Fc treatment. (B-C)

Islet insulin content. 10 week HFD mice were ip injected with FKN-Fc every other day for

total 8 week and the islet was isolated for measure total insulin content per islet (B) and

GSIS (C) activity per well. Mean $\pm$ SEM. (D) Q-PCR analyses of mRNA expression in the

islets of HFD mice treated with vehicle or FKN-Fc for 8 weeks. mRNA expression was

measured by realtime RT Q-PCR. Mean $\pm$ SEM,  $n = 4$ . \*  $p < 0.05$  versus lane 1; #  $p < 0.05$

versus lane 2; one way ANOVA. AU, arbitrary unit. (E) Oral GTTs in 15 week-old *ob/ob*

mice treated with vehicle or FKN-Fc (30 mg/kg) for 7 weeks. Mean $\pm$ SEM,  $n = 7-8$ .

\* $p < 0.05$ ; \*\* $p < 0.01$ ; two tailed unpaired t-test. **(F)** Caspase-3/7 activity assays in the islets from the *ob/ob* mice treated with vehicle or FKN-Fc (30 mg/kg) for 7 weeks. Mean $\pm$ -SEM,  $n = 4$ . \* $p < 0.05$ ; two tailed unpaired t-test. AU, arbitrary unit. **(G)** Q-PCR analyses in the islets from the *ob/ob* mice treated with vehicle or FKN-Fc (30 mg/kg) for 7 weeks. Mean $\pm$ -SEM,  $n = 4$ . \* $p < 0.05$  and \*\* $p < 0.01$  versus lane 1; # $p < 0.05$  and ## $p < 0.01$  versus lane 2; one way ANOVA.

### **Supplementary Figure 3. Chronic FKN-Fc administration ameliorates hepatic**

**steatosis in obese mice. (A-D)** Chronic FKN-Fc administration ameliorates hepatic steatosis in HFD mice. 10 week HFD mice were ip injected with vehicle or FKN-Fc (30 mg/kg) every other day. After 8 weeks of FKN-Fc treatment, mice were sacrificed and liver weight **(A)**, epididymal adipose tissue weight **(B)**, liver triglyceride (TG) content **(C)** and liver none-esterified fatty acid (NEFA) content **(D)** were measured. Mean $\pm$ -SEM,  $n = 8$ .

\* $p < 0.05$ ; \*\* $p < 0.01$ ; two tailed unpaired t-test. **(E)** Liver and adipose tissue histology analyses in *ob/ob* mice. 8 week-old *ob/ob* mice were ip injected with FKN-Fc (30 mg/kg) every other day for 7 weeks. Liver (left row) and epididymal adipose tissue (right row)

samples were harvested and fixed for histology analyses. Liver samples were stained with hematoxylin and eosin (H&E). Adipose tissue macrophages were assessed after staining with anti-F4/80 antibodies. **(F)** Serum adipokine levels in HFD mice treated with vehicle or FKN-Fc for 8 weeks. Mean $\pm$ SEM, n = 4. **(G)** Gluconeogenic activity in NCD mouse hepatocytes. Conversion rate of  $^{14}\text{C}$ -labeled pyruvate to glucose was measured in primary hepatocytes after 3 h incubation with glucagon (10 ng/ml), FKN and/or insulin (10 nM) in the presence or absence of MEK inhibitors, U0126 (200 nM) or PD98059 (10  $\mu\text{M}$ ). Mean $\pm$ SEM. n = 4. \*p<0.05 versus lane 1; #p<0.05 versus lane 3; one way ANOVA.

**Supplementary Figure 4. Identification of primary alpha and beta cells in intact mouse islets.** Functional characterization of beta and alpha cells in intact mouse islets. **(A)** Intact mouse pancreatic islets were isolated from transgenic mice expressed EGFP under the control of the mouse insulin 1 promoter. Epifluorescence and bright field images were obtained with a 20X objective lens and an inverted epifluorescence microscope (TE2000-U, Nikon) equipped with Evolve 512 EMCCD (Photometrics). The contrast and brightness of images were adjusted to improve the image quality with Image J software. **(B)** Membrane

currents elicited by a 5-ms depolarization from -70 mV to 0 mV using K<sup>+</sup>-containing intracellular solution and the extracellular solution including 10 mM TEA-Cl. Ca<sup>2+</sup> current is only shown in  $\beta$  cell (*left*) and transient inward current followed by TEA-resistance outward K<sup>+</sup> current is recorded in  $\alpha$  cell (*right*). (C) Intracellular ATP levels in Min6 cells treated with or without FKN (100ng/ml), U0126 (200 nM) and/or PD98059 (10  $\mu$ M) in low (left) or high (right) glucose conditions.

**Supplementary Figure 5. FKN inhibit K<sub>ATP</sub> activity in an ERK-dependent manner**

**without changing cAMP levels in alpha cells.** (A) K<sub>ATP</sub> channel current activity before and after by FKN treatment in the presence or absence of U0126. A representative data was present from 5 (without U0126) or 6 (with U0126) separate cell measurements . \*p<0.05 versus control without FKN treatment; two-tailed unpaired t-test. (B) Intracellular cAMP levels in  $\alpha$ TC1-6 cells after 1 hour incubation in 1mM glucose KRB with either: 100 nM insulin, 10 ng/ml mFKN, 100 ng/ml mFKN, 100 nM GLP-1, 10 ng/ml mFKN + 100 ng/ml pertussis toxin, 100 ng/ml mFKN + 100 ng/ml pertussis toxin or 25 mM glucose KRB. Data presented as means +/- SEM, data a combination of two experiments, n = 3-8. (C) Schematic model of FKN action mechanisms in alpha and beta cells and hepatocytes.

# Supplementary Figure 1

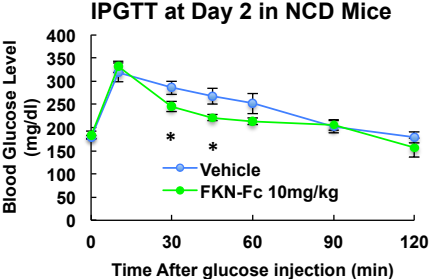

**Supplementary Figure 1. 10 mg/kg FKN-Fc improves glucose tolerance for 2 days in lean mice.** GTTs in NCD WT mice at day 2. A single injection of 10 mg/kg FKN-Fc or vehicle was given to NCD WT mice at day 0 and, at day 2, glucose tolerance was measured without any further FKN-Fc administration. Mean $\pm$ SEM. \* $p < 0.05$ ;  $n = 8$  for both groups (result of 1 time experiment), by two way ANOVA with post hoc t-tests between the individual groups.

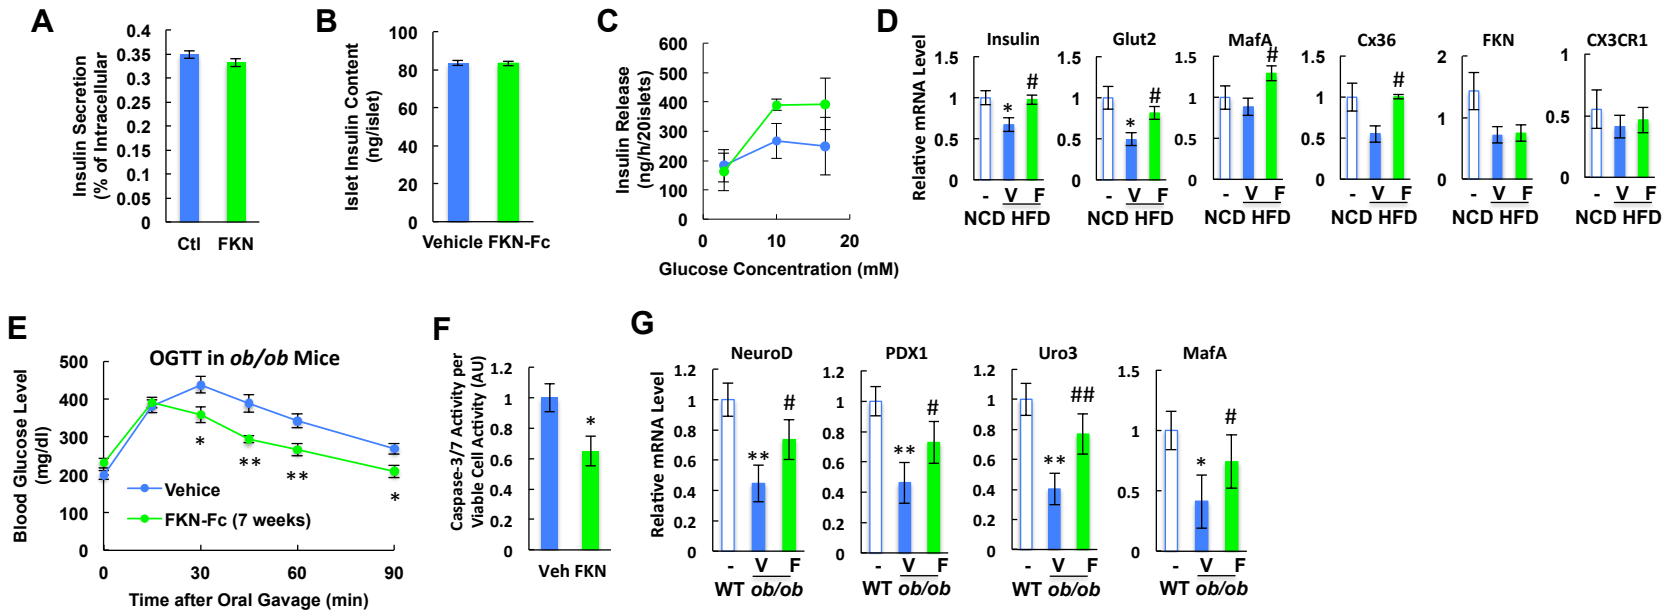

**Supplementary Figure 2. Chronic FKN-Fc administration increases insulin secretion and decreases apoptosis in the islets of obese mice.** (A) Insulin secretion activity in Min6 cells incubated in low glucose (2 mM) conditions with or without FKN-Fc treatment. (B-C) Islet insulin content. 10 week HFD mice were ip injected with FKN-Fc every other day for total 8 week and the islet was isolated for measure total insulin content per islet (B) and GSIS (C) activity per well. Mean $\pm$ SEM. (D) Q-PCR analyses of mRNA expression in the islets of HFD mice treated with vehicle or FKN-Fc for 8 weeks. mRNA expression was measured by realtime RT Q-PCR. Mean $\pm$ SEM, n = 4. \*p<0.05 versus lane 1; #p<0.05 versus lane 2; one way ANOVA. AU, arbitrary unit. (E) Oral GTTs in 15 week-old *ob/ob* mice treated with vehicle or FKN-Fc (30 mg/kg) for 7 weeks. Mean $\pm$ SEM, n = 7-8. \*p<0.05; \*\*p<0.01; two tailed unpaired t-test. (F) Caspase-3/7 activity assays in the islets from the *ob/ob* mice treated with vehicle or FKN-Fc (30 mg/kg) for 7 weeks. Mean $\pm$ SEM, n = 4. \*p<0.05; two tailed unpaired t-test. AU, arbitrary unit. (G) Q-PCR analyses in the islets from the *ob/ob* mice treated with vehicle or FKN-Fc (30 mg/kg) for 7 weeks. Mean $\pm$ SEM, n = 4. \*p<0.05 and \*\*p<0.01 versus lane 1; #p<0.05 and ##p<0.01 versus lane 2; one way ANOVA.

## Supplementary Figure 3

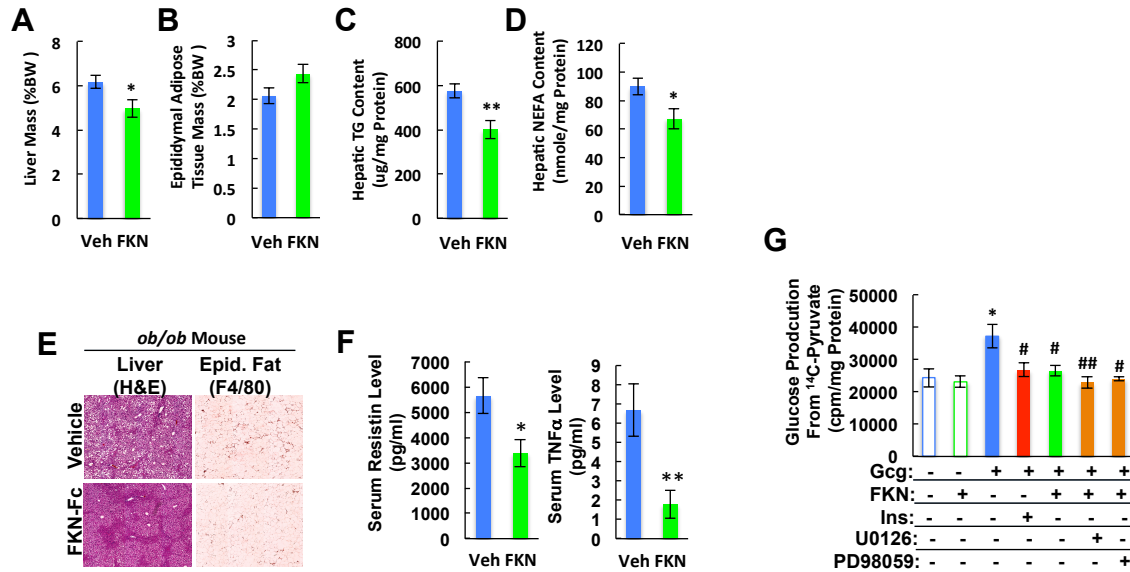

**Supplementary Figure 3. Chronic FKN-Fc administration ameliorates hepatic steatosis in obese mice.** (A-D) Chronic FKN-Fc administration ameliorates hepatic steatosis in HFD mice. 10 week HFD mice were ip injected with vehicle or FKN-Fc (30 mg/kg) every other day. After 8 weeks of FKN-Fc treatment, mice were sacrificed and liver weight (A), epididymal adipose tissue weight (B), liver triglyceride (TG) content (C) and liver none-esterified fatty acid (NEFA) content (D) were measured. Mean $\pm$ -SEM, n = 8. \*p<0.05; \*\*p<0.01; two tailed unpaired t-test. (E) Liver and adipose tissue histology analyses in *ob/ob* mice. 8 week-old *ob/ob* mice were ip injected with FKN-Fc (30 mg/kg) every other day for 7 weeks. Liver (left row) and epididymal adipose tissue (right row) samples were harvested and fixed for histology analyses. Liver samples were stained with hematoxylin and eosin (H&E). Adipose tissue macrophages were assessed after staining with anti-F4/80 antibodies. (F) Serum adipokine levels in HFD mice treated with vehicle or FKN-Fc for 8 weeks. Mean $\pm$ -SEM, n = 4. (G) Gluconeogenic activity in NCD mouse hepatocytes. Conversion rate of  $^{14}\text{C}$ -labeled pyruvate to glucose was measured in primary hepatocytes after 3 h incubation with glucagon (10 ng/ml), FKN and/or insulin (10 nM) in the presence or absence of MEK inhibitors, U0126 (200 nM) or PD98059 (10 mM). Mean $\pm$ -SEM. n = 4. \*p<0.05 versus lane 1; #p<0.05 versus lane 3; one way ANOVA.

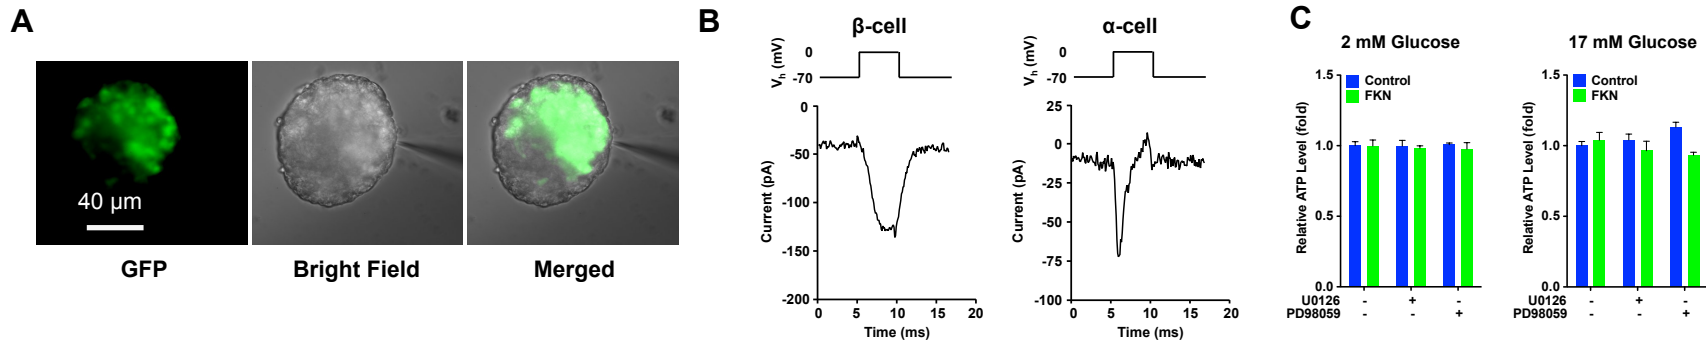

**Supplementary Figure 4. Identification of primary alpha and beta cells in intact mouse islets.** Functional characterization of beta and alpha cells in intact mouse islets. **(A)** Intact mouse pancreatic islets were isolated from transgenic mice expressed EGFP under the control of the mouse insulin 1 promoter. Epifluorescence and bright field images were obtained with a 20X objective lens and an inverted epifluorescence microscope (TE2000-U, Nikon) equipped with Evolve 512 EMCCD (Photometrics). The contrast and brightness of images were adjusted to improve the image quality with Image J software. **(B)** Membrane currents elicited by a 5-ms depolarization from -70 mV to 0 mV using  $K^+$ -containing intracellular solution and the extracellular solution including 10 mM TEA-Cl.  $Ca^{2+}$  current is only shown in  $\beta$  cell (*left*) and transient inward current followed by TEA-resistance outward  $K^+$  current is recorded in  $\alpha$  cell (*right*). **(C)** Intracellular ATP levels in Min6 cells treated with or without FKN (100ng/ml), U0126 (200 nM) and/or PD98059 (10 mM) in low (left) or high (right) glucose conditions.

## Supplementary Figure 4



# Supplementary Figure 5

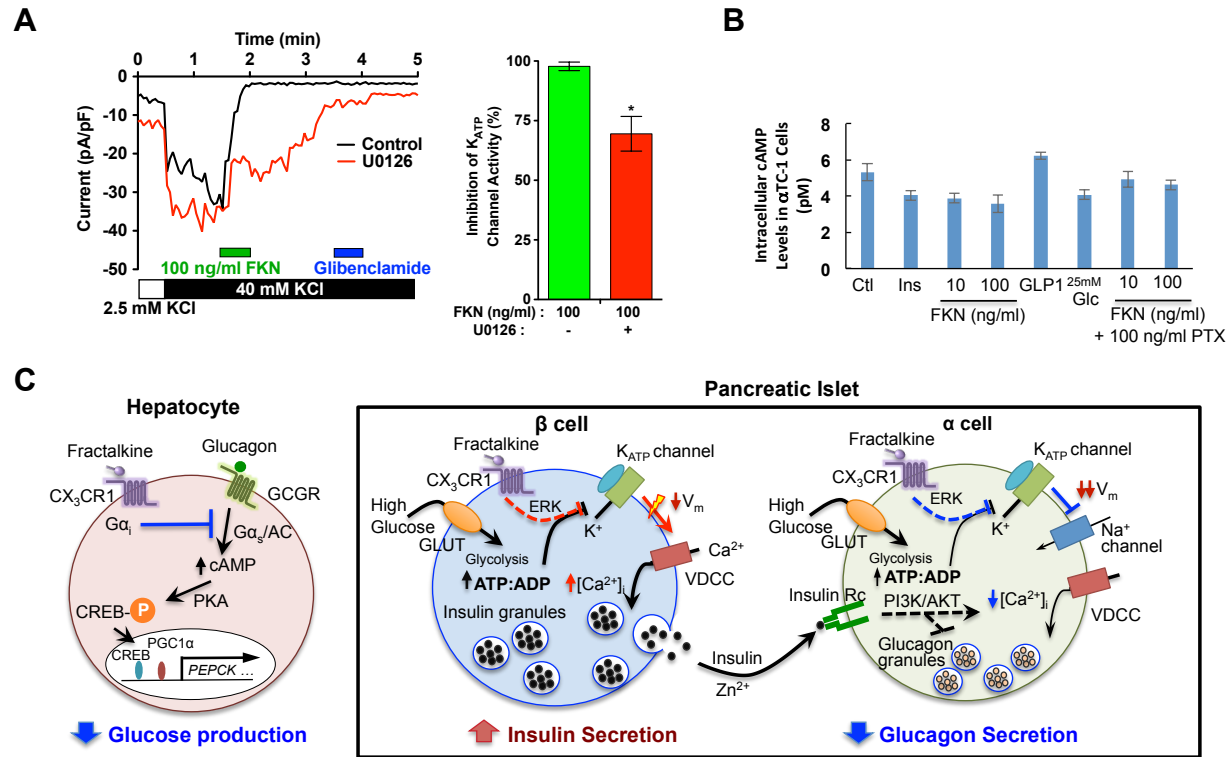

**Supplementary Figure 5. FKN inhibit  $K_{ATP}$  activity in an ERK-dependent manner without changing cAMP levels in alpha cells.** (A)  $K_{ATP}$  channel current activity before and after by FKN treatment in the presence or absence of U0126. A representative data was presented from 5 (without U0126) or 6 (with U0126) separate cell measurements. \* $p < 0.05$  versus control without FKN treatment; two-tailed unpaired t-test. (B) Intracellular cAMP levels in  $\alpha$ TC-1 cells after 1 hour incubation in 1mM glucose KRB with either: 100 nM insulin, 10 ng/ml mFKN, 100 ng/ml mFKN, 100 nM GLP-1, 10 ng/ml mFKN + 100 ng/ml pertussis toxin, 100 ng/ml mFKN + 100 ng/ml pertussis toxin or 25 mM glucose KRB. Data presented as means  $\pm$  SEM, data a combination of two experiments,  $n = 3-8$ . (C) Schematic model of FKN action mechanisms in alpha and beta cells and hepatocytes.

Full unedited film for the Western blots in Figure 3 (Riopel et al.)

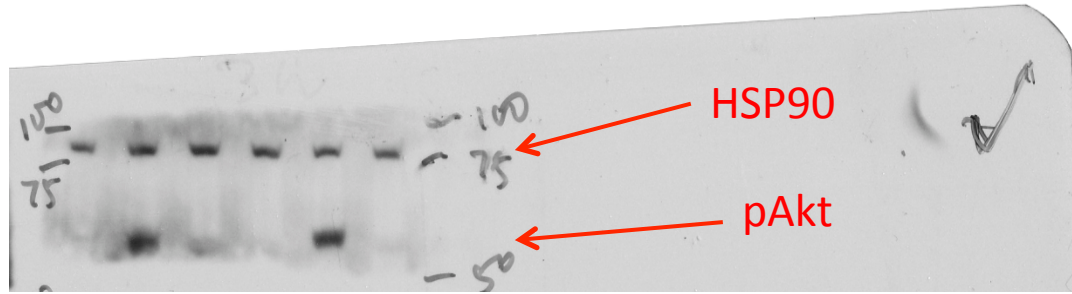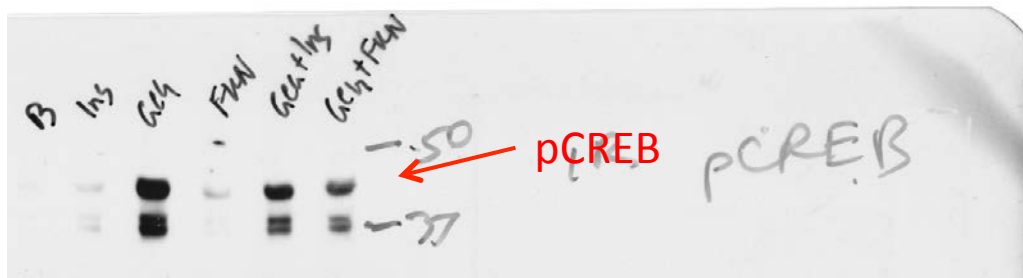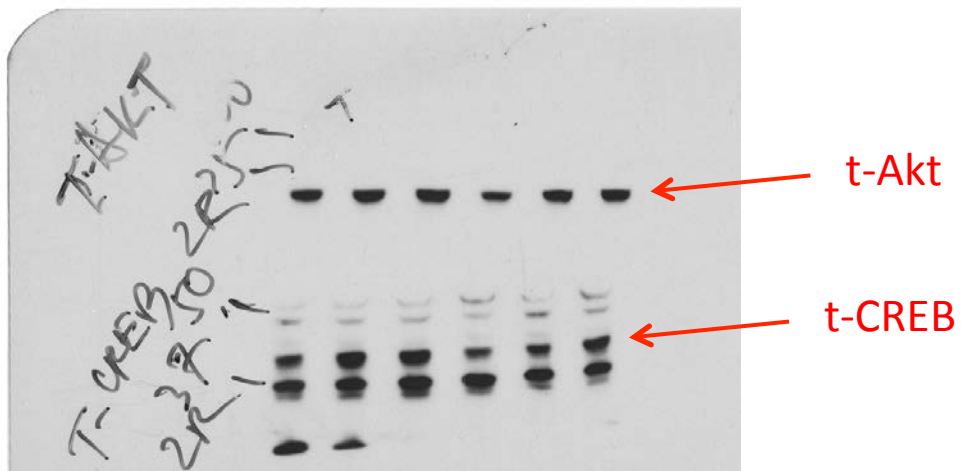

Supplement: sd1 [file 1]
